# Supplementary material for: Cancer‐Associated Fibroblast‐Induced Remodeling of Tumor Microenvironment in Recurrent Bladder Cancer
Source: PubMed Central journal article supplement (PMC10625065; doi:10.1002/advs.202303230), 2023-09-24
Supplement: ADVS-10-2303230-s001.pdf [file ADVS-10-2303230-s001.pdf]

## Supporting Information

for *Adv. Sci.*, DOI 10.1002/adv.202303230

Cancer-Associated Fibroblast-Induced Remodeling of Tumor Microenvironment in Recurrent Bladder Cancer

*Ting Liang, Tao Tao\**, Kai Wu, Lisha Liu, Wuwu Xu, Dewang Zhou, Hu Fang, Qiuxia Ding, Guixiao Huang and Song Wu\*

## Supporting Information

### **Cancer-Associated Fibroblast-Induced Remodeling of Tumor Microenvironment in Recurrent Bladder Cancer**

*Ting Liang<sup>1, 3#</sup>, Tao Tao<sup>1, 3#</sup>, Kai Wu<sup>1, 3</sup>, Lisha Liu<sup>1, 3</sup>, Wuwu Xu<sup>1, 3</sup>, Dewang Zhou<sup>1, 3</sup>,  
Hu Fang<sup>2</sup>, Qiuxia Ding<sup>1, 3</sup>, Guixiao Huang<sup>1</sup>, and Song Wu<sup>1, 2, 3\*</sup>*

**Table S1. Clinical data of bladder carcinoma and non-malignant tissues**

| Sample ID | Gender | Age | Grade | Stage   | Surgery             | Number of cells |
|-----------|--------|-----|-------|---------|---------------------|-----------------|
| Pri._1    | M      | 58  | High  | pT2N0M0 | TURBT <sup>a)</sup> | 5588            |
| Pri._2    | M      | 28  | Low   | pTa     | TURBT               | 5606            |
| Pri._3    | F      | 78  | High  | pT1     | TURBT               | 8476            |
| Rec._1    | M      | 58  | High  | pT2N0M0 | TURBT               | 5512            |
| Rec._2    | M      | 59  | High  | pT2N0M0 | TURBT               | 15088           |
| Rec._3    | M      | 59  | High  | pT2N0M0 | RC <sup>b)</sup>    | 10782           |
| Rec._4    | M      | 61  | High  | pT3N0M0 | RC                  | 4926            |
| Rec._Nor. | M      | 59  | -     | -       | RC                  | 8262            |

<sup>a)</sup>TURBT: transurethral resection of bladder tumor; <sup>b)</sup>RC: radical cystectomy

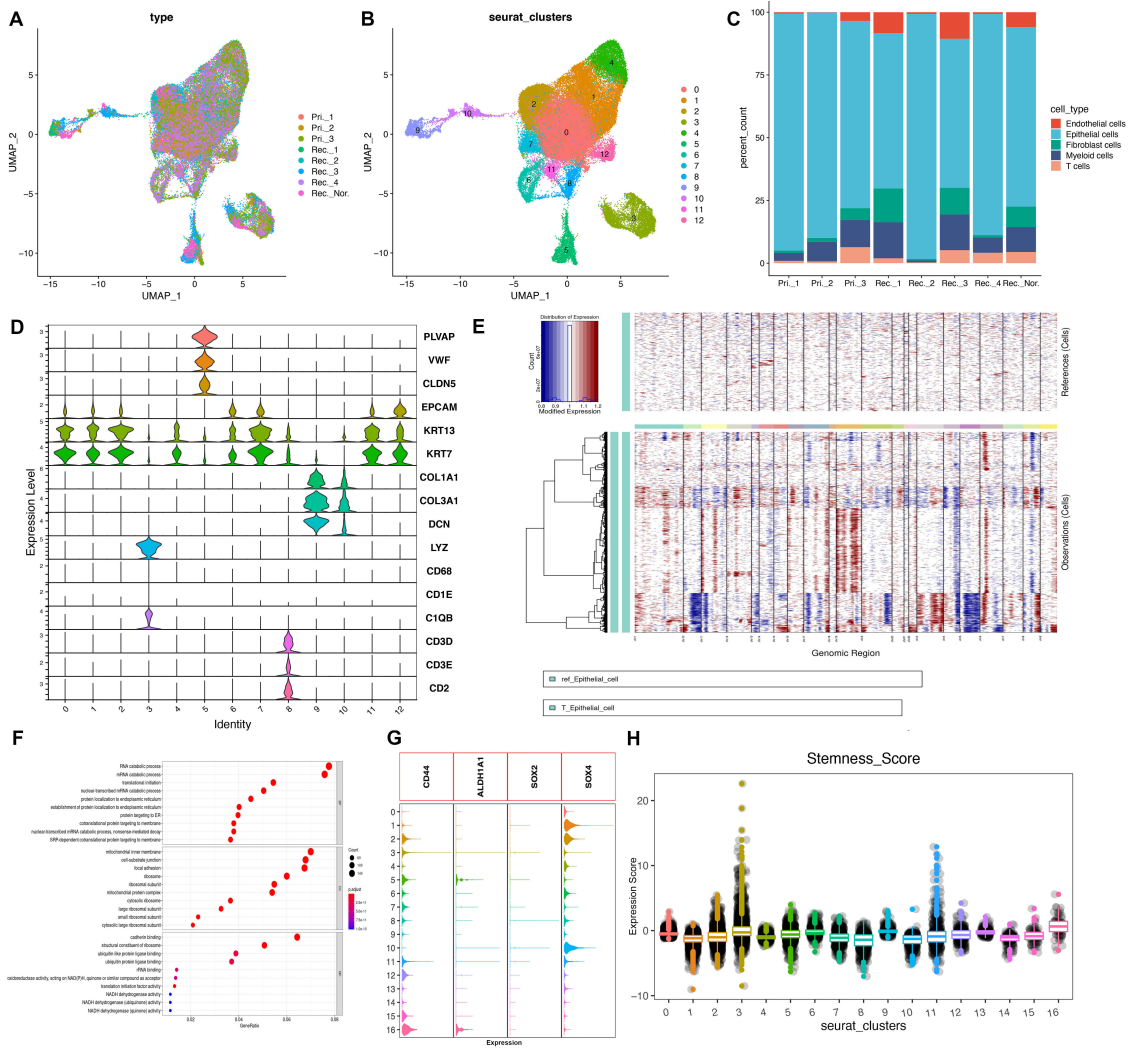

**Figure S1. Illustrating the ScRNA-seq profiles of major cell types.** A) UMAP plot of single cells profiled here colored by sample origin. B) UMAP plot of single cells profiled here colored by each cluster. C) The fraction of major cell types originated from 3 primary tumors, 4 recurrent tumors and 1 normal adjacent sample. D) Expression of marker genes for each cluster. E) Copy number variations (CNVs) evaluated per cell by InferCNV. Normal-derived epithelial clusters were used as control group. F) Enriched GO functions of DEGs in epithelial cells between primary and recurrent BC. G) Violin plots show expression level of CSC markers. H) The stemness score among different clusters of epithelial cells.

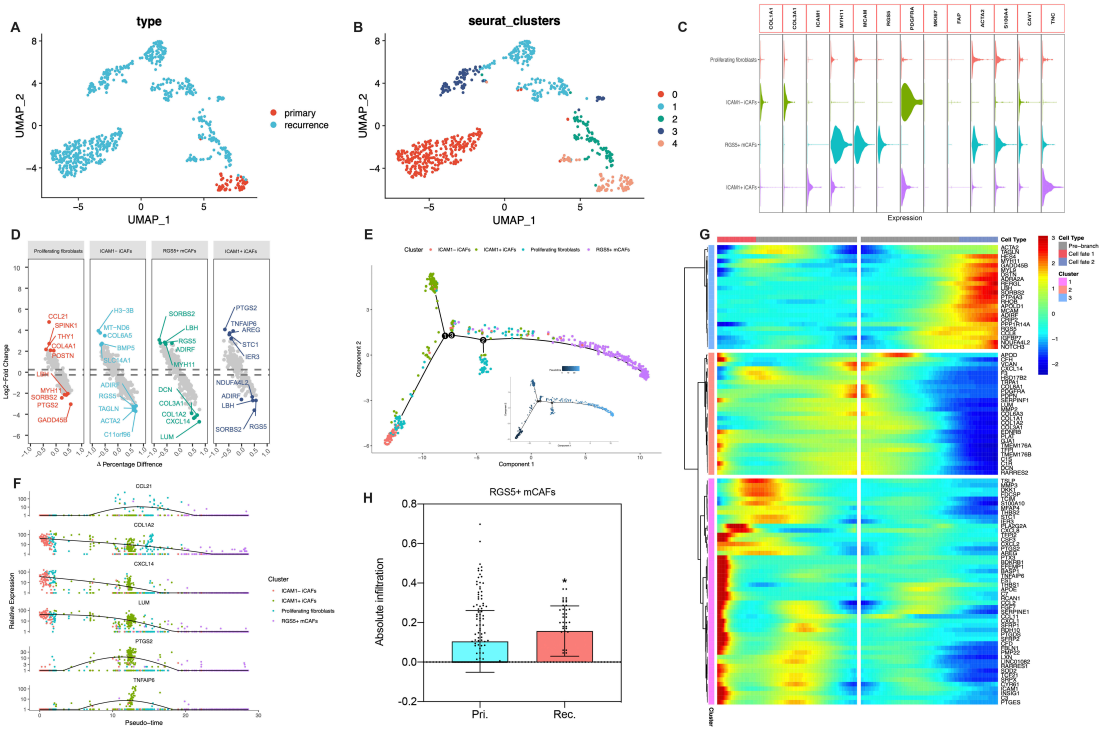

**Figure S2. Assessing the functional states of fibroblast cells in primary and recurrent BC.** UMAP plot of fibroblast cells, colored by tumor origin (A) and cluster (B). C) Violin plots show expression level of fibroblast subgroups markers. D) Top5 DEGs of different fibroblast subgroups between primary and recurrent BC. E) and G) Plot showing pseudotime ordering of different fibroblast subgroups by Monocle2. F) Trajectory of the representative markers' expression. G) Heatmap showing the top100 genes expressed with pseudotime trajectory of fibroblast subgroups. H) The infiltrated abundance of RGS5+ mCAFs in primary and recurrent BC samples. The results presented are the mean  $\pm$ SD (n=189). \*, P<0.05.

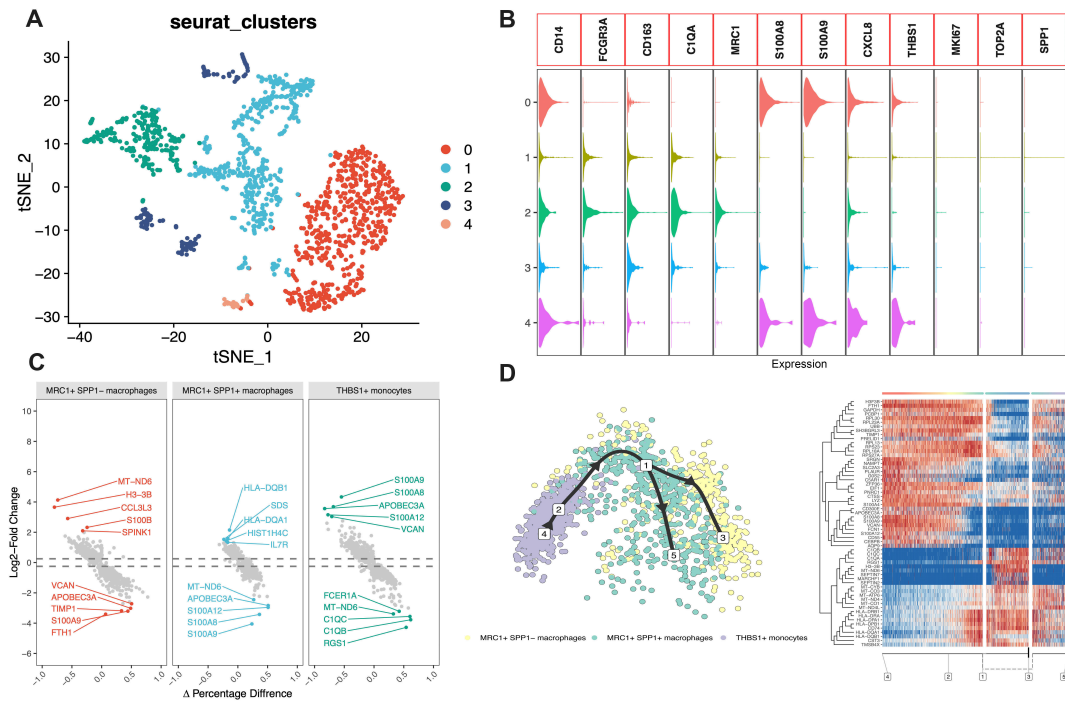

**Figure S3. Assessing the functional characteristics of myeloid cells in primary and recurrent BC.** A) tSNE plots of myeloid cells, colored by re-clusters. B) Violin plots show expression level of myeloid cells subgroups markers. C) Expression of top5 differential genes in myeloid cells subgroups. D) Plot showing pseudotime ordering of different myeloid cells subtypes by Slingshot, and Trajectory of the top60 markers expression.

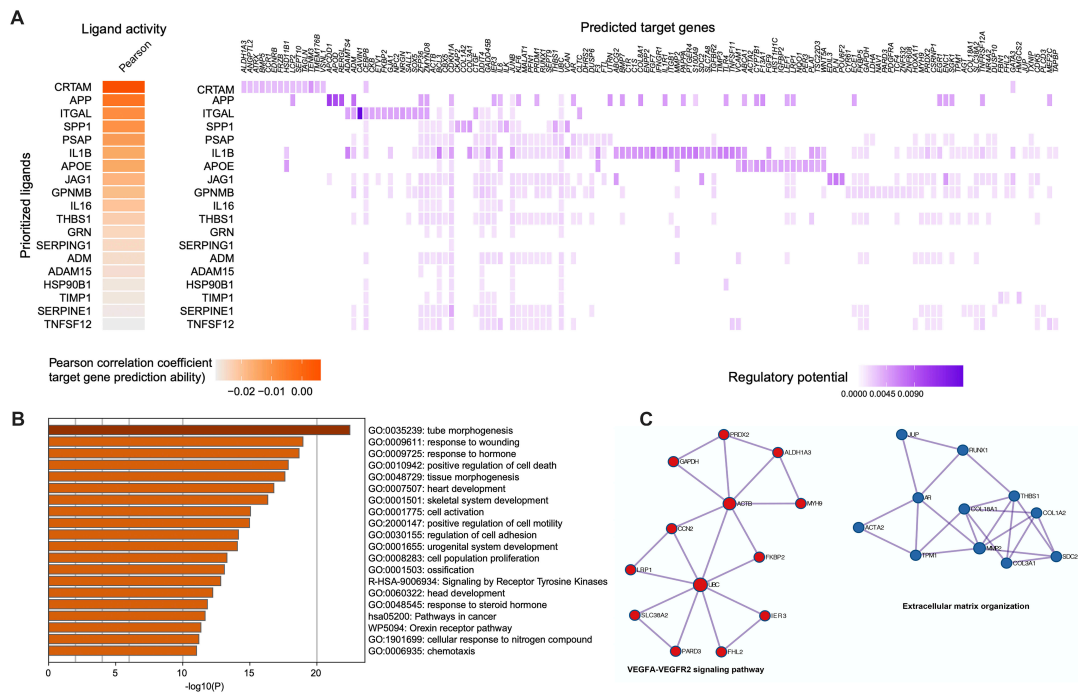

**Figure S4. The interaction network between MDSCs and CAFs.** A) Top-ranked ligands inferred to regulate CAFs by THBS1+ monocytes and heatmap showing regulatory potential across CAFs according to NicheNet. B) and C) Representative pathways enrichment and Co-expression network of the predicted target genes expressed in CAFs by Metascape.
